# Supplementary material for: In vitro–in vivo evaluation of hyaluronic acid-based amphiphilic copolymers for tumour targeted delivery: the role of hydrophobic groups
Source: Royal Society of Chemistry journal article supplement (doi:10.1039/c7ra03211k), 2017-01-01
Supplement: c7ra03211k1.pdf [file c7ra03211k1.pdf]

### Supporting information

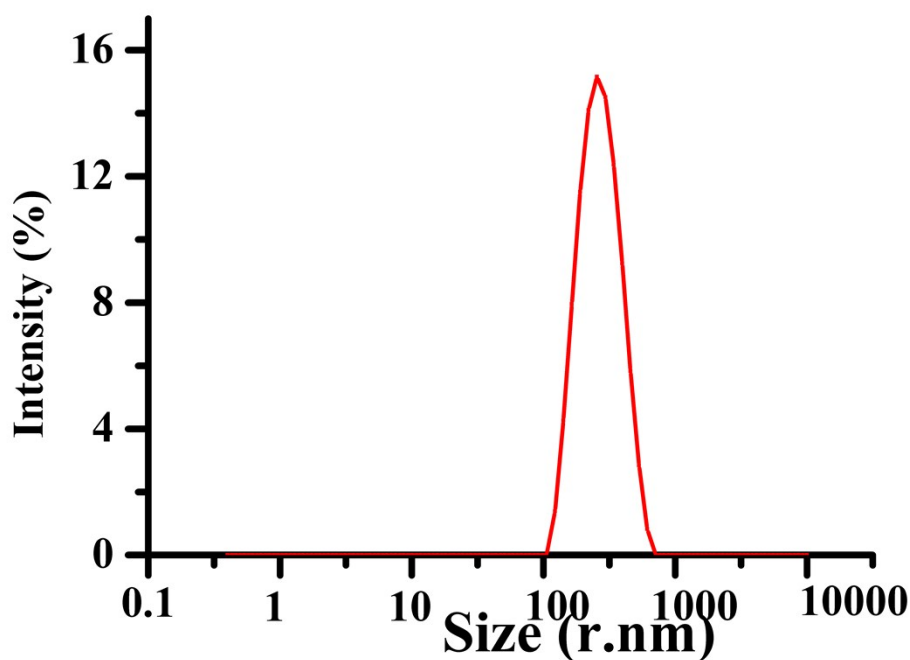

**Fig.S1** The size of HA-SA-CYS-CHOL micelles analyzed by DLS

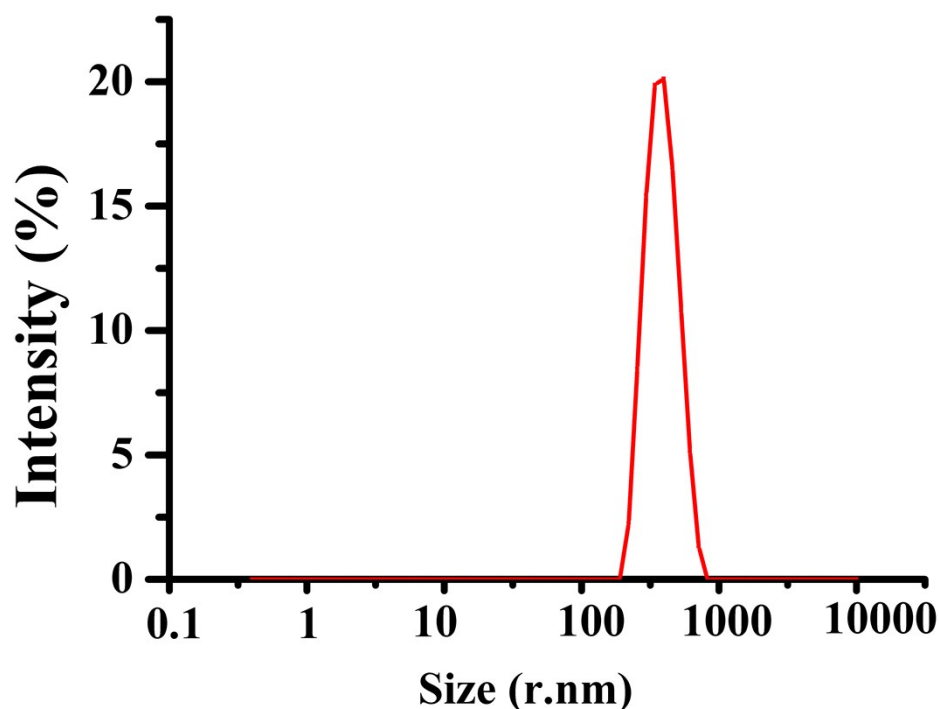

**Fig.S2** The size of HA-SA-CYS-OA micelles analyzed by DLS

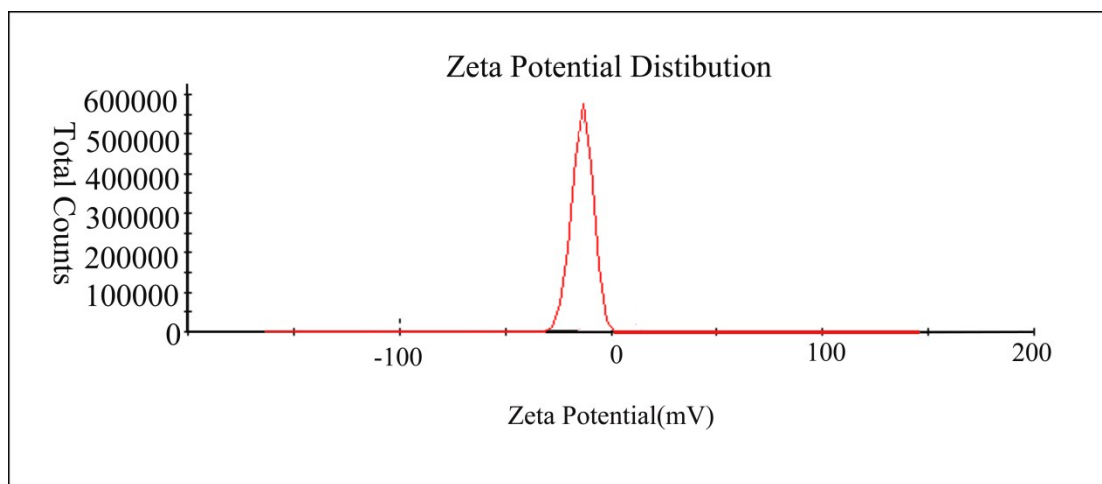

**Fig.S3 The zeta potential of HA-SA-CYS-CHOL micelles analyzed by DLS**

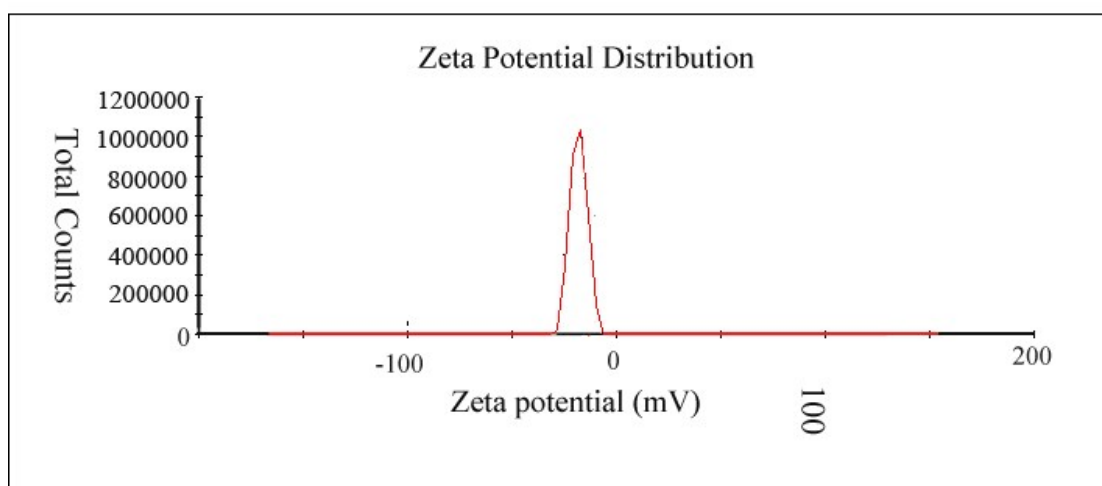

**Fig.S4 The zeta potential of HA-SA-CYS-OA micelles analyzed by DLS**

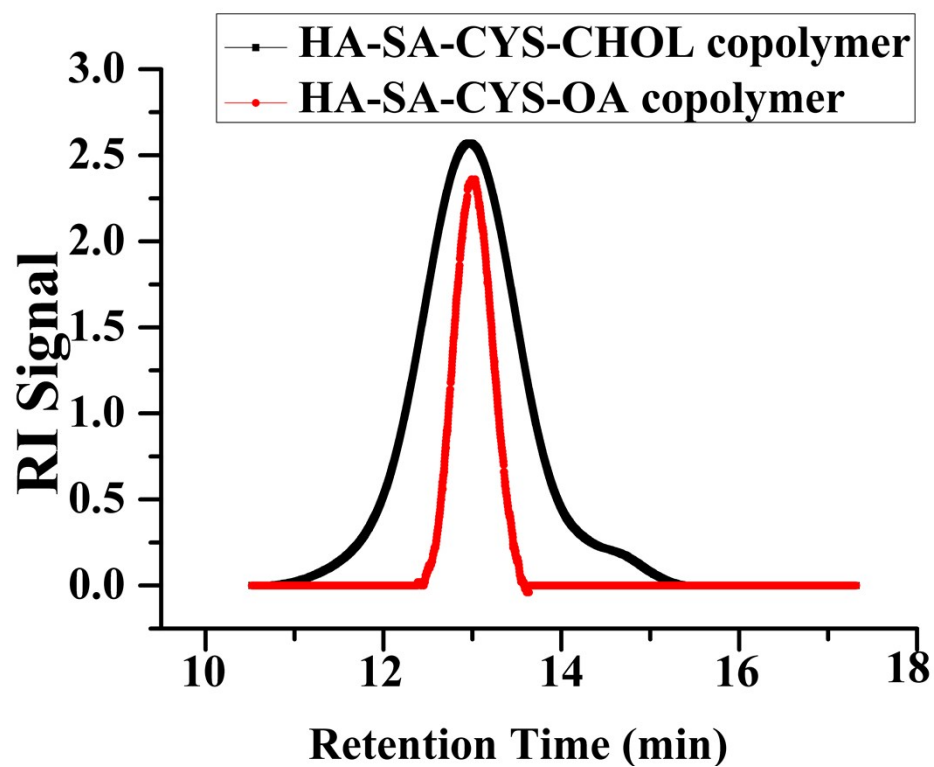

**Fig.S5 Gel permeation chromatograms of HA-SA-CYS-CHOL and HA-SA-CYS-OA.**

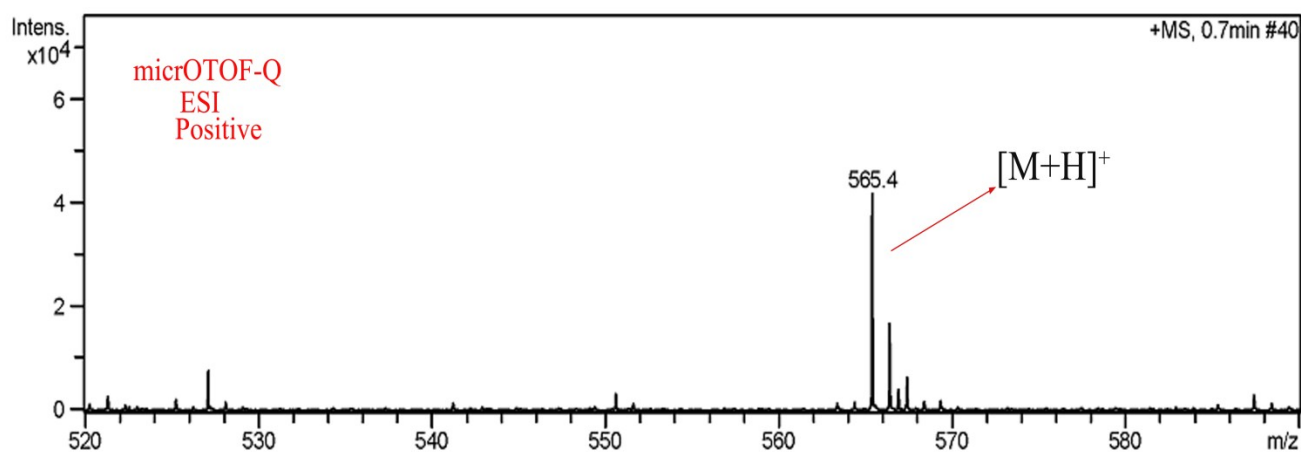

**Fig.S6 ESI-MS of CYS-OA (Ion Polarity: POSITIVE), the  $[m/z]^+$  of CYS-OA is 564.**
